# Supplementary material
Source: Research Square preprint supplement (doi:10.21203/rs.3.rs-8856008/v1)
Supplement: Supplementary file 1 [file 901a29397c6a82d1d5f60719.docx]

**Figures and Figure Legend:**

**Figure 1: Timeline of key breakthroughs and milestone events in the research of S1P modulators.**

A schematic showing the timeline of key breakthroughs and milestone events in the research of S1P modulators. Fingolimod was first identified in 1995 as a synthetic derivative of the natural compound myriocin, which was originally isolated from the fungus Isaria sinclairii [32]. Its immunosuppressive mechanism was subsequently elucidated using in vitro and in vivo rodent models of MS [33]. Clinical trials of fingolimod were conducted between 2006 and 2007 [34], leading to its FDA approval in 2010 for the treatment of relapsing forms of MS [31]. Following this approval, more receptor-selective S1P modulators targeting S1PR1 and/or S1PR5, including siponimod, ozanimod, and ponesimod, underwent clinical evaluation [35-37] and were subsequently approved by the FDA in 2019, 2020, and 2021, respectively [31]. Figure prepared in Microsoft PowerPoint (available at [www.microsoft.com](https://www.microsoft.com/en-us/microsoft-365/powerpoint)).

**Figure 2:** **A PRISMA flow diagram showing article selection for the systematic review.**

Out of 237 studies from three databases, 24 were eligible for inclusion in this systematic review. Flow diagram created by Covidence.

**Figure 3: SYRCLE risk of bias assessment of selected articles.**

All 24 studies were reviewed and assessed using the following criteria: D1: Random sequence generation; D2: Baseline characteristics; D3: Allocation concealment; D4: Random housing; D5: Blinding for caregivers and/or investigators; D6: Random outcome assessment; D7: Blinding of outcome assessment; D8: Incomplete outcome data; D9: Selective reporting; and D10: Other sources of bias. Red: High bias; Yellow: Unclear bias; Green: Low bias [39]. Both the (A) “stop-light” figure and (B) summary graph were created using the *robvis* Shiny web application (available at [shinyapps.io/robvis](https://mcguinlu.shinyapps.io/robvis/)) [40].

**Figure 4:** **Distribution of research articles on S1P modulators**.

Of 24 articles, fingolimod (FTY720) was studied most frequently, with 16 studies, followed by siponimod with 4 studies. One study was on ozanimod, RP-101074 (ozanimod metabolite), ponesimod, CYM5442, and JTE-013. One study investigated both the effect of Fingolimod as well as CYM5442 [51]. Figure prepared in GraphPad Prism (available at [www.graphpad.com](https://www.graphpad.com/))

**Figure 5:** **Distribution of S1P modulator research published over time.**

Line graph showing the number of published articles reporting the effect of S1PR modulation on remyelination in mammalian *in vivo* models. Figure prepared in GraphPad Prism (available at [www.graphpad.com](https://www.graphpad.com/))
